# Supplementary material for: Improvement of Intensive In-Seam Gas Drainage Technology at Kirova Mine in Kuznetsk Coal Basin
Source: MDPI journal article supplement (doi:10.3390/en15031047), 2022-01-30
Supplement: s1 [file s1]

Archive with 1 entries (1 files):
- energies-1405487-supplementary.pdf
